# Supplementary material for: MAFG‐AS1 promotes tumor progression via regulation of the HuR/PTBP1 axis in bladder urothelial carcinoma
Source: PubMed Central journal article supplement (PMC7744027; doi:10.1002/ctm2.241), 2020-12-16

# Supplementary Figure 1

**A**

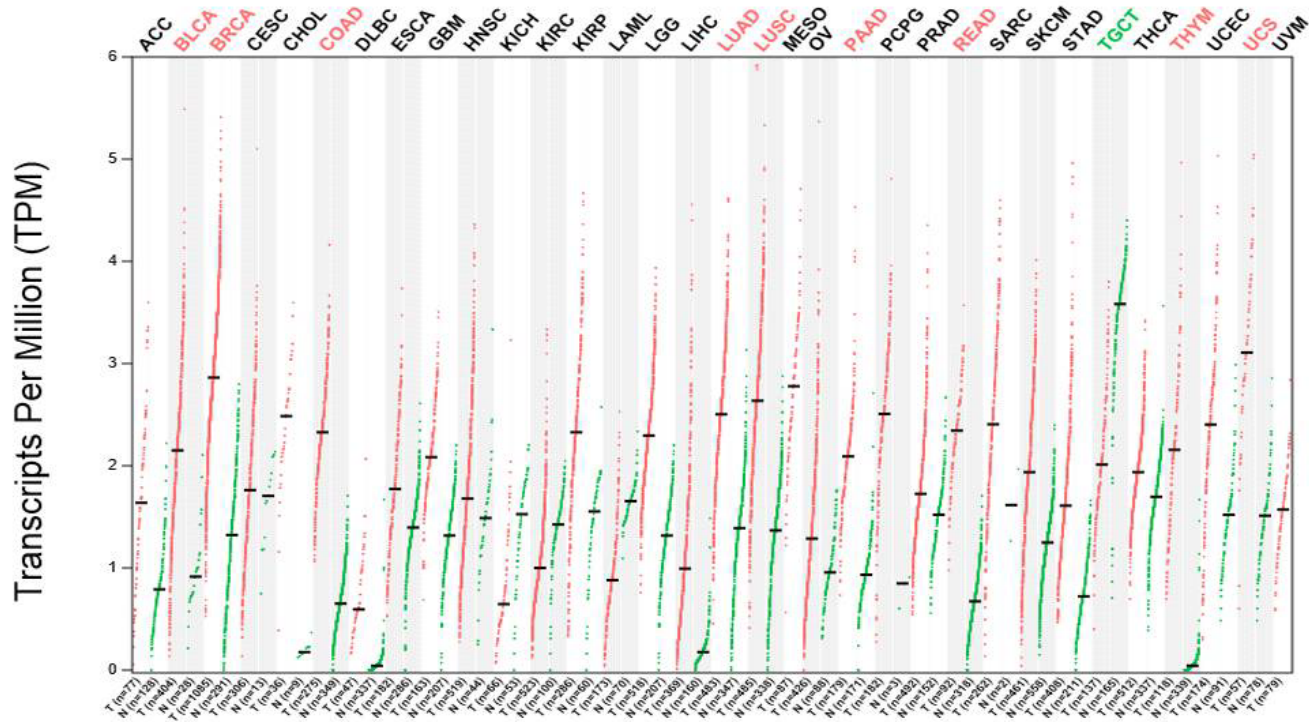

**B**

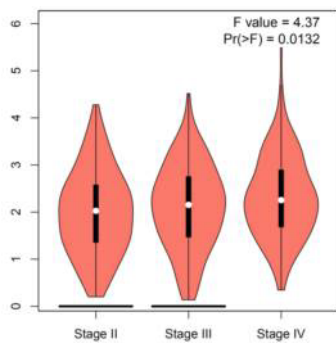

**C**

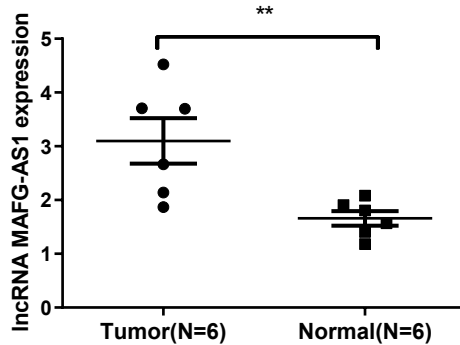

**D**

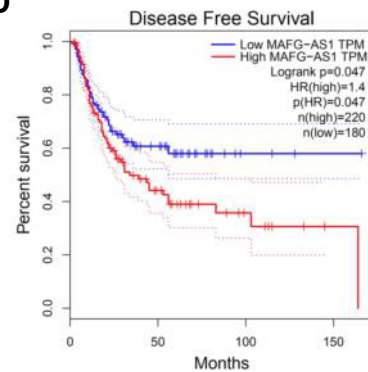

Supplement: CTM2-10-e241-s001.pdf [file CTM2-10-e241-s001.pdf]
