# Supplementary material for: MAFG‐AS1 promotes tumor progression via regulation of the HuR/PTBP1 axis in bladder urothelial carcinoma
Source: PubMed Central journal article supplement (PMC7744027; doi:10.1002/ctm2.241), 2020-12-16

**A**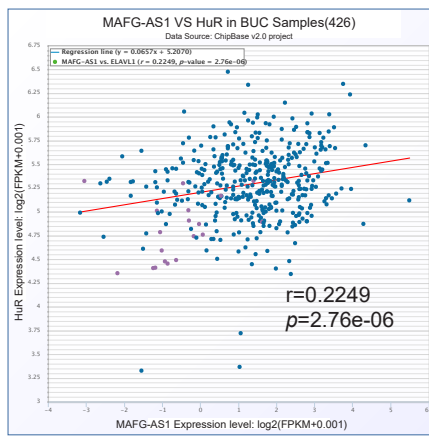**C**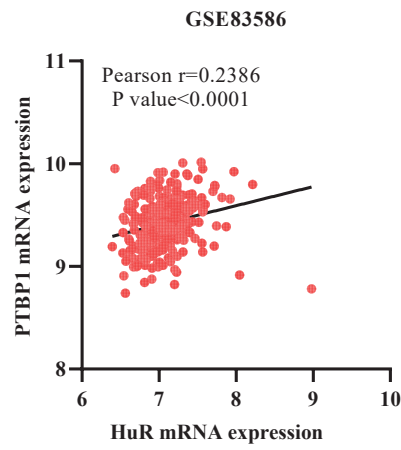**D**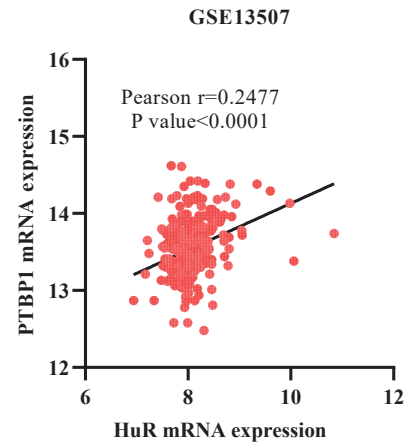**B**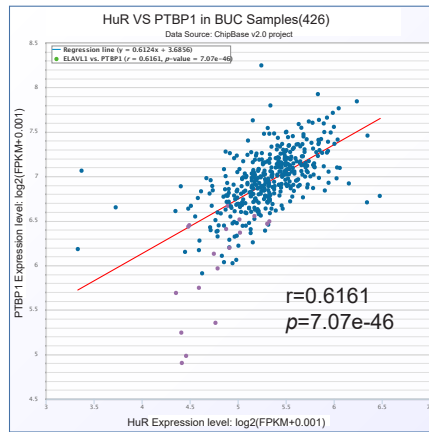**E**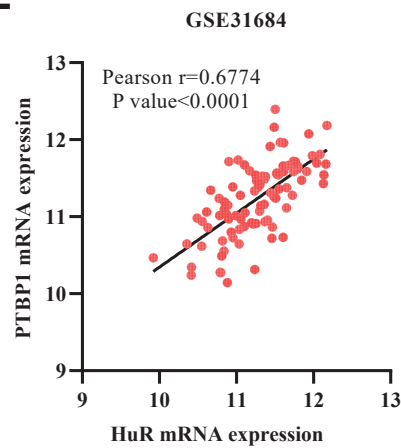**F**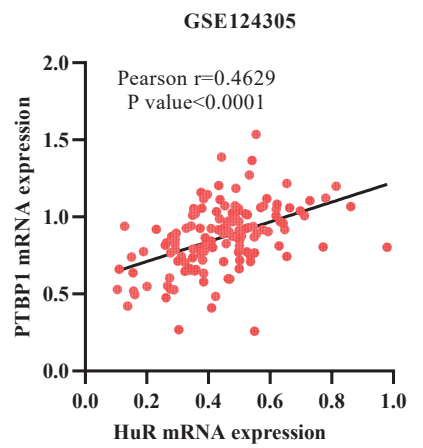**G**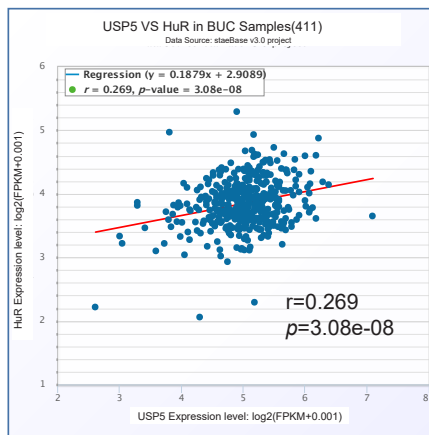**H**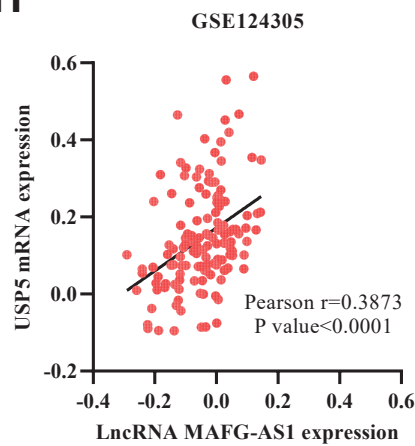**I**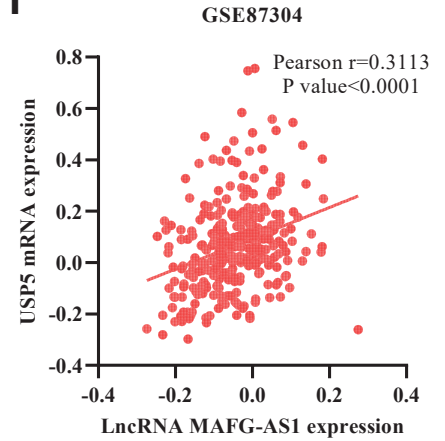

Supplement: CTM2-10-e241-s003.pdf [file CTM2-10-e241-s003.pdf]
