# Supplementary material for: MAFG‐AS1 promotes tumor progression via regulation of the HuR/PTBP1 axis in bladder urothelial carcinoma
Source: PubMed Central journal article supplement (PMC7744027; doi:10.1002/ctm2.241), 2020-12-16
Supplement: CTM2-10-e241-s005.pdf [file CTM2-10-e241-s005.pdf]

**Table S1:** Correlation of MAFG-AS1 expression in tissue with patients' clinicopathological variables in 102 cases of BUC.

| Variables          | Cases | MAFG-AS1 expression |          | P- value <sup>a</sup> |
|--------------------|-------|---------------------|----------|-----------------------|
|                    |       | Low(%)              | High(%)  |                       |
| Age (years)        |       |                     |          | 0.541                 |
| ≤65 <sup>b</sup>   | 53    | 27(50.9)            | 26(49.1) |                       |
| >65                | 49    | 22(44.9)            | 27(55.1) |                       |
| Sex                |       |                     |          | 0.657                 |
| Male               | 87    | 41(47.1)            | 46(52.9) |                       |
| Female             | 15    | 8(53.3)             | 7(46.7)  |                       |
| Tumor size (cm)    |       |                     |          | 0.16                  |
| ≤3.4 <sup>c</sup>  | 53    | 29(54.7)            | 24(45.3) |                       |
| >3.4               | 49    | 20(40.8)            | 29(59.2) |                       |
| Tumor multiplicity |       |                     |          | 0.086                 |
| Unifocal           | 22    | 7(31.8)             | 15(68.2) |                       |
| Multifocal         | 80    | 42(52.5)            | 38(47.5) |                       |
| Tumor grade        |       |                     |          | 0.616                 |
| G1                 | 15    | 7(46.7)             | 8(53.3)  |                       |
| G2                 | 45    | 24(53.3)            | 21(46.7) |                       |
| G3                 | 42    | 18(42.9)            | 24(57.1) |                       |
| pT category        |       |                     |          | <b>0.009</b>          |
| pTa/pT1            | 28    | 18(64.3)            | 10(35.7) |                       |
| pT2                | 40    | 18(45.0)            | 22(55.0) |                       |
| pT3                | 25    | 13(52.0)            | 12(48.0) |                       |
| pT4                | 9     | 0(0.0)              | 9(100.0) |                       |
| pN category        |       |                     |          | <b>0.002</b>          |
| pN-                | 80    | 45(56.3)            | 35(43.8) |                       |
| pN+                | 22    | 4(18.2)             | 18(81.8) |                       |

<sup>a</sup>Chi-square test; <sup>b</sup>median age; <sup>c</sup>median size; BUC: bladder urothelial carcinom.
