# Supplementary material for: MAFG‐AS1 promotes tumor progression via regulation of the HuR/PTBP1 axis in bladder urothelial carcinoma
Source: PubMed Central journal article supplement (PMC7744027; doi:10.1002/ctm2.241), 2020-12-16
Supplement: CTM2-10-e241-s006.pdf [file CTM2-10-e241-s006.pdf]

**Table S2:** Univariate analysis of factors associated with survival of 102 patients

| Variable                                      | HR (95% CI)           | P- value         |
|-----------------------------------------------|-----------------------|------------------|
| MAFG-AS (high vs. low)                        | 7.336 (2.851-18.878)  | <b>&lt;0.001</b> |
| Age (>65 vs. ≤65)                             | 1.051 (0.546-2.025)   | 0.881            |
| Gender (female vs. male)                      | 1.123 (0.466-2.707)   | 0.797            |
| Tumor size (>3.4 vs. ≤3.4)                    | 1.179 (0.618-2.251)   | 0.617            |
| Tumor multiplicity (multifocal vs. unifocal)  | 1.079 (0.520-2.236)   | 0.839            |
| Tumor grade (G3 vs. G2 vs. G1)                | 1.264 (0.784-2.039)   | 0.336            |
| pT category (pT4 vs. pT3 vs. pT2 vs. pTa/pT1) | 2.462 (1.687-3.592)   | <b>&lt;0.001</b> |
| pN category ( pN+ vs. pN-)                    | 13.273 (6.060-29.072) | <b>&lt;0.001</b> |

HR: hazard ratio; CI: confidence interval; BUC: bladder urothelial carcinom.
