# Supplementary material for: MAFG‐AS1 promotes tumor progression via regulation of the HuR/PTBP1 axis in bladder urothelial carcinoma
Source: PubMed Central journal article supplement (PMC7744027; doi:10.1002/ctm2.241), 2020-12-16
Supplement: CTM2-10-e241-s007.pdf [file CTM2-10-e241-s007.pdf]

**Table S3:** Multivariate analysis of prognostic factors on survival (Cox regressio

| Variable                                     | HR (95% CI)          | <i>P</i> -value |
|----------------------------------------------|----------------------|-----------------|
| MAFG-AS1 (high vs. low)                      | 4.603 (1.708-12.407) | <b>0.003</b>    |
| pT category (pT4 vs. pT3 vs. pT2 vs. pTa/pT) | 1.236(0.783-1.951)   | 0.364           |
| pN category ( pN+ vs. pN-)                   | 6.044(2.124-17.201)  | <b>0.001</b>    |

HR: hazard ratio; CI: confidence interval.
